# Supplementary material
Source: ML conference proceedings conference paper supplement (https://proceedings.mlr.press/v54/ashizawa17a.html)
Supplement: Supplementary file [file ashizawa17a-supp.pdf]

---

# Supplementary Material for “Least-Squares Log-Density Gradient Clustering for Riemannian Manifolds”

---

**Mina Ashizawa**<sup>1</sup>      **Hiroaki Sasaki**<sup>2,3</sup>      **Tomoya Sakai**<sup>1</sup>      **Masashi Sugiyama**<sup>3,1</sup>  
<sup>1</sup>The University of Tokyo, Japan    <sup>2</sup>Nara Institute of Science and Technology, Japan    <sup>3</sup>RIKEN, Japan

## 1 Derivation of Eq.(9)

Here, we show the details for the derivation of Eq.(9) from Eq.(8).

For two functions  $h, f \in C^\infty(\mathcal{M})$ , we have the following relation (Hsu, 2002):

$$\operatorname{div}(h(\mathbf{X})\nabla f(\mathbf{X})) = \langle \nabla h(\mathbf{X}), \nabla f(\mathbf{X}) \rangle_H + h(\mathbf{X})\Delta f(\mathbf{X}). \quad (1)$$

Recall  $\langle \mathbf{X}, \mathbf{Y} \rangle_H = \operatorname{tr}(\mathbf{X}^\top \mathbf{Y})$  and  $\psi_l(\mathbf{X}) = \nabla \phi_l(\mathbf{X}) = -\frac{1}{2\sigma^2} \nabla \delta(\mathbf{X}, \mathbf{C}_l)^2 \phi_l(\mathbf{X})$ , where  $\operatorname{tr}(\mathbf{A}) = \sum_{i=1}^d A_{i,i}$  for a square matrix  $\mathbf{A} \in \mathbb{R}^{d \times d}$ . Using Eq.(1) we have

$$\begin{aligned} \operatorname{div}(\psi_l(\mathbf{X})) &= -\frac{1}{2\sigma^2} \operatorname{div}(\phi_l(\mathbf{X})\nabla \delta(\mathbf{X}, \mathbf{C}_l)^2) \\ &= -\frac{1}{2\sigma^2} \langle \nabla \phi_l(\mathbf{X}), \nabla \delta(\mathbf{X}, \mathbf{C}_l)^2 \rangle_H - \frac{1}{2\sigma^2} \phi_l(\mathbf{X}) \Delta \delta(\mathbf{X}, \mathbf{C}_l)^2 \\ &= \frac{1}{4\sigma^4} \|\nabla \delta(\mathbf{X}, \mathbf{C}_l)^2\|^2 \phi_l(\mathbf{X}) - \frac{1}{2\sigma^2} \phi_l(\mathbf{X}) \sum_{j=1}^d \left[ \mathbf{P}_{\mathbf{X}} \frac{\partial}{\partial X^{(j)}} \nabla \delta(\mathbf{X}, \mathbf{C}_l)^2 \right]^{(j)}, \end{aligned} \quad (2)$$

where  $\mathbf{P}_{\mathbf{X}}$  is the orthogonal projection onto the tangent space  $T_{\mathbf{X}}\mathcal{M}$  (Hsu, 2002, Theorem 3.1.4). For the Grassmann manifold  $\mathcal{G}_{d_1, d_2}$ , we have  $\mathbf{P}_{\mathbf{X}} = \mathbf{I}_{d_1} - \mathbf{X}\mathbf{X}^\top$  and  $\nabla \delta(\mathbf{X}, \mathbf{Y})^2 = -2(\mathbf{I}_{d_1} - \mathbf{X}\mathbf{X}^\top)\mathbf{Y}\mathbf{Y}^\top\mathbf{X}$ , where  $\mathbf{X}, \mathbf{Y} \in \mathcal{G}_{d_1, d_2}$ . Plugging these equations into Eq.(2) yields  $\widehat{h}_l$  in Eq.(9).

## References

E. P. Hsu. *Stochastic Analysis on Manifolds*. American Mathematical Society, 2002.
